# Supplementary material for: Li 2 MnCl 4 single crystal: a new candidate for a red-emitting neutron scintillator
Source: Royal Society of Chemistry journal article supplement (doi:10.1039/d4ma00697f), 2024-01-01
Supplement: d4ma00697f1.pdf [file d4ma00697f1.pdf]

## Li<sub>2</sub>MnCl<sub>4</sub> single crystal: a candidate for novel red-emitting neutron scintillator – Supporting information.

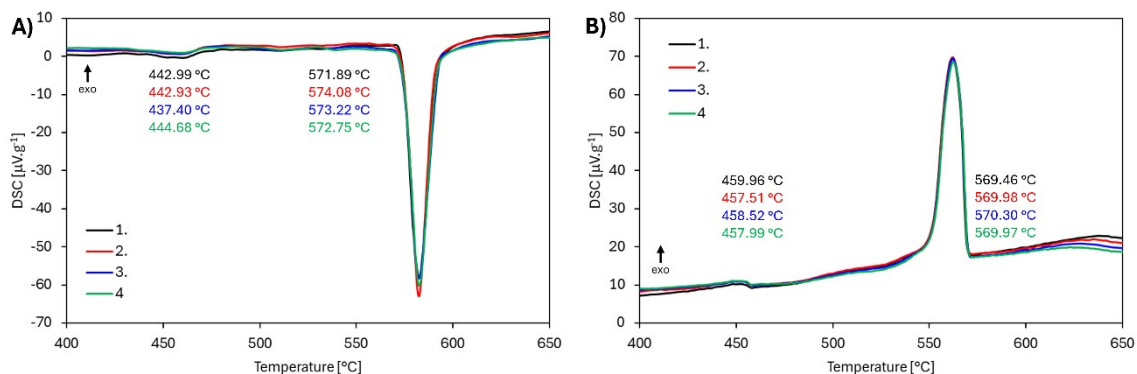

Fig. 1: DSC measurement of the undoped Li<sub>2</sub>MnCl<sub>4</sub> sealed in quartz ampoules A) heating curve B) cooling curve. The values of onset temperatures are in separate windows.

### Fitting of absorption spectra

The first derivative of the undoped Li<sub>2</sub>MnCl<sub>4</sub> absorption spectra was fitted assuming gaussian shaped bands using non-linear least squares. The following formula to fit the band shape:

$$\frac{dA}{dE} a' e^{-\frac{(E-b)^2}{c}} = -\frac{2a'(E-b)}{c} e^{-\frac{(E-b)^2}{c}} = \frac{a(E-b)}{c} e^{-\frac{(E-b)^2}{c}},$$

where  $a'$ ,  $a$ ,  $b$ , and  $c$  are fitting coefficients,  $E$  is energy, and  $A$  is absorbance. Therefore, the overall fitting function used was:

$$A(E) = d + \sum_{i=1}^6 \frac{a_i(E-b_i)}{c_i} e^{-\frac{(E-b_i)^2}{c_i}},$$

where  $d$  is a constant background. The results of the fitting procedure are listed in table S1.

Table S1: Coefficients of the fitting procedure with 95 % confidence intervals.

| Coefficient | Value    | Lower bound | Upper bound |
|-------------|----------|-------------|-------------|
| a1          | -0.00504 | -0.005207   | -0.004872   |
| a2          | -0.00342 | -0.003642   | -0.003207   |
| a3          | -0.00195 | -0.002105   | -0.001798   |
| a4          | -0.00029 | -0.0003839  | -0.0001982  |
| a5          | -0.00079 | -0.0005855  | -0.001003   |
| a6          | -0.00099 | -0.000819   | -0.001157   |
| b1          | 3.495    | 3.494       | 3.496       |
| b2          | 3.358    | 3.355       | 3.36        |
| b3          | 2.948    | 2.946       | 2.95        |
| b4          | 2.927    | 2.925       | 2.929       |
| b5          | 2.755    | 2.741       | 2.77        |
| b6          | 2.358    | 2.348       | 2.368       |
| c1          | 0.001954 | 0.001859    | 0.002049    |
| c2          | 0.00678  | 0.006138    | 0.007422    |
| c3          | 0.002207 | 0.001963    | 0.00245     |
| c4          | 0.000195 | 0.0001096   | 0.0002808   |
| c5          | 0.01245  | 0.007537    | 0.01736     |
| c6          | 0.01286  | 0.009464    | 0.01626     |
| d           | -0.002   | -0.002216   | -0.001784   |

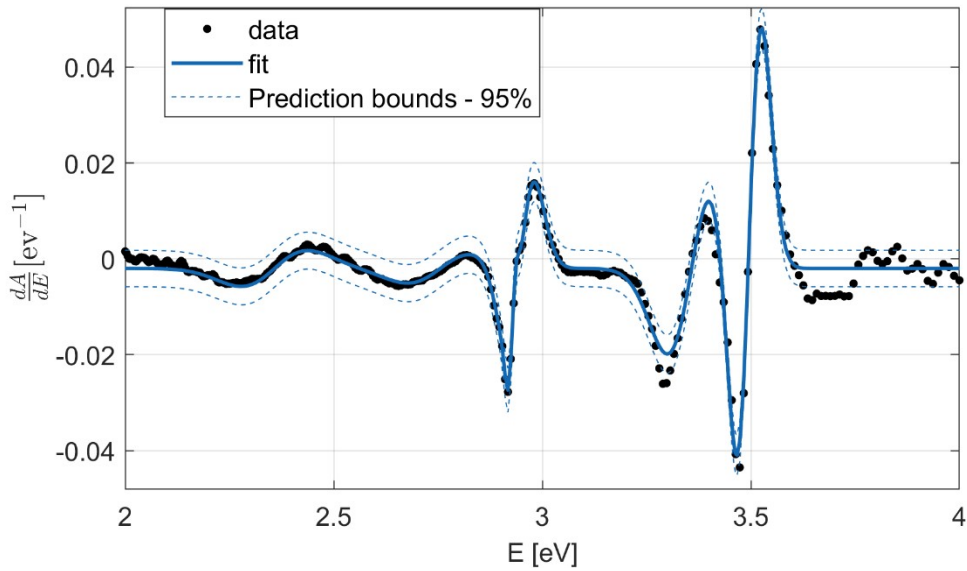

Fig S2: Fitting of the first derivative of absorption spectrum of the undoped  $\text{Li}_2\text{MnCl}_4$  with six gaussian components. The dashed line shows 95 % prediction bounds.

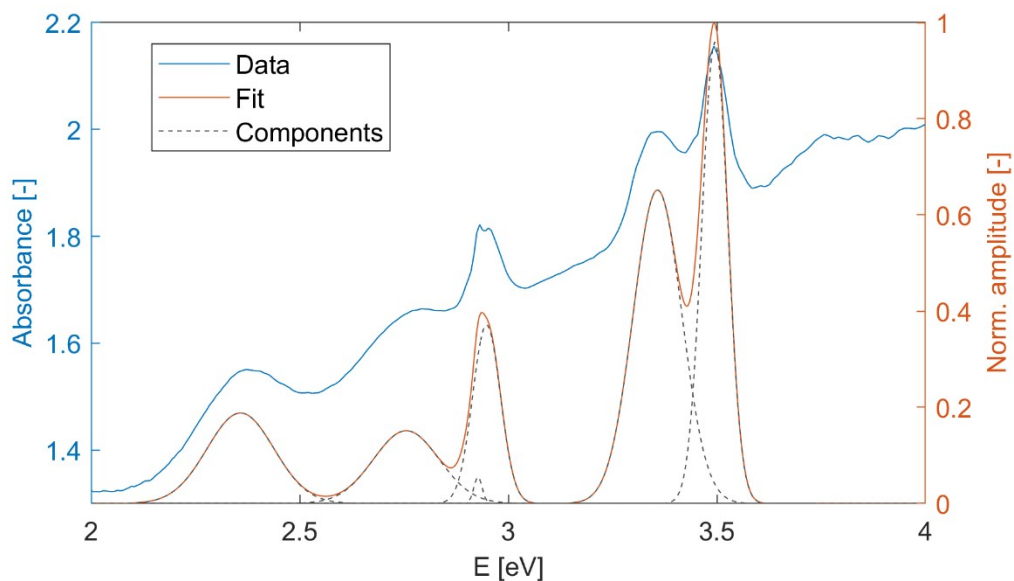

Fig S3: Comparison between the measured absorption spectrum and normalized spectrum reconstructed from the first derivative fitting.

Tab. S2: Position of the absorption bands resulting from the fitting procedure with assigned transitions, ratios between transition energies from absorption spectra  $E_i/E_1$  (exp.) and from Tanabe-Sugano diagram  $E_i/E_1$  (TS) at  $D_q/B = 9.1$ , corresponding values of  $E/B$  and calculated Racah parameter  $B$ .

| Transition                                           | Band max. [nm] | Band max. [eV] | $E_i/E_1$ (exp.) [-] | $E_i/E_1$ (TS) [-] | $E/B$ [-] | $B$ [ $\text{cm}^{-1}$ ] |
|------------------------------------------------------|----------------|----------------|----------------------|--------------------|-----------|--------------------------|
| ${}^6A_{1g} \rightarrow {}^4T_{1g} ({}^4G)$          | 526            | 2.36           | 1.00                 | 1.00               | 26.3      | 723                      |
| ${}^6A_{1g} \rightarrow {}^4T_{2g} ({}^4G)$          | 450            | 2.76           | 1.17                 | 1.16               | 30.4      | 731                      |
| ${}^6A_{1g} \rightarrow {}^4A_{1g}, {}^4E_g ({}^4G)$ | 422            | 2.94           | 1.25                 | 1.23               | 32.4      | 731                      |
| ${}^6A_{1g} \rightarrow {}^4T_{2g} ({}^4D)$          | 369            | 3.36           | 1.42                 | 1.42               | 37.4      | 725                      |
| ${}^6A_{1g} \rightarrow {}^4E_g ({}^4D)$             | 355            | 3.50           | 1.48                 | 1.50               | 39.4      | 716                      |

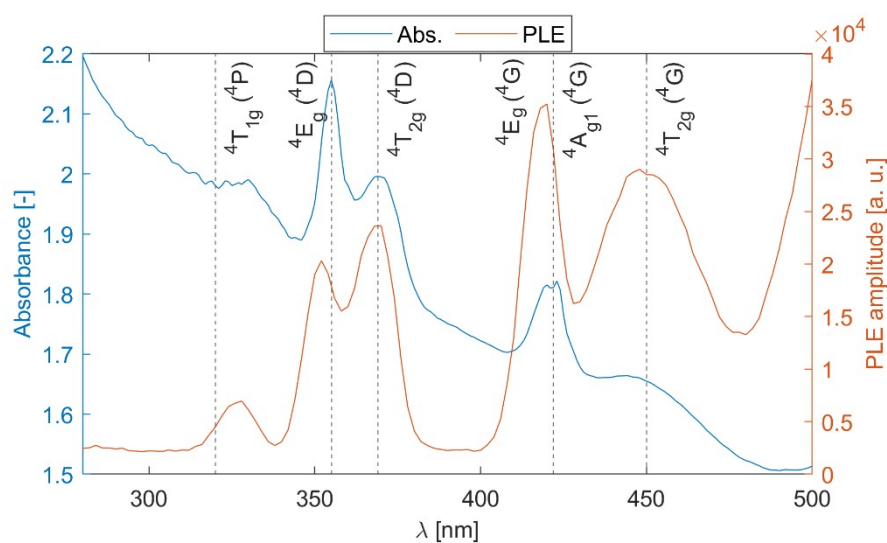

Fig. S4: Comparison of absorption and PLE (em. 620 nm) spectra with band assignment for the undoped  $\text{Li}_2\text{MnCl}_4$ . The position of the  ${}^6\text{A}_{1g} \rightarrow {}^4\text{T}_{1g} ({}^4\text{P})$  transition was determined from the  $d^5$  TS diagram at  $D_q/B = 9.1$ .

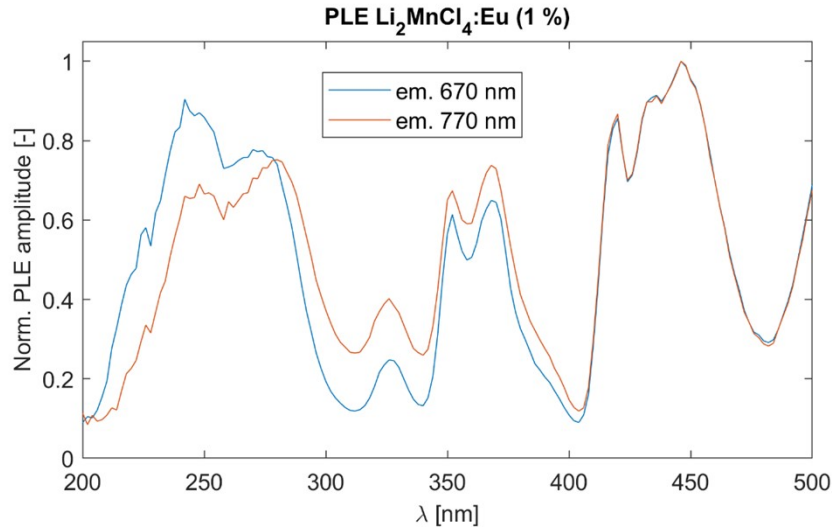

Fig. S5: Normalized PLE spectra of  $\text{Li}_2\text{MnCl}_4:\text{Eu}$  for  $\lambda_{\text{em}} = 670, 770$  nm.

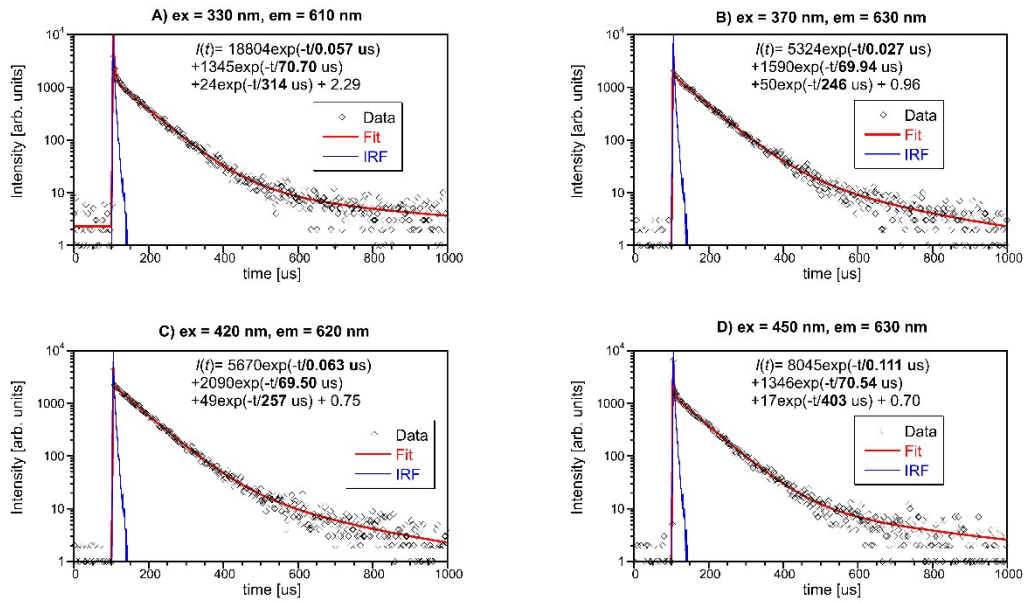

Fig. S6: PL decay curves for undoped  $\text{Li}_2\text{MnCl}_4$ . Excitation and emission wavelengths are listed in the title of each subfigure. Red solid line is convolution of function  $I(t)$  and instrumental response.

Tab. S3: Summary of the PL decay kinetics of undoped  $\text{Li}_2\text{MnCl}_4$ .  $X_i$  is an integral contribution of  $i$ -th component.

| $\lambda_{\text{ex}}$ [nm] | $\lambda_{\text{em}} \sim 620$ nm |           |                         |           | $t_{\text{mean}}$ [ $\mu\text{s}$ ] |
|----------------------------|-----------------------------------|-----------|-------------------------|-----------|-------------------------------------|
|                            | $t_1$ [ $\mu\text{s}$ ]           | $X_1$ [%] | $t_2$ [ $\mu\text{s}$ ] | $X_2$ [%] |                                     |
| 330                        | 70.7                              | 92.7      | 314.0                   | 7.3       | 88.6                                |
| 370                        | 69.9                              | 90.0      | 246.0                   | 10.0      | 87.5                                |
| 420                        | 69.5                              | 92.0      | 257.0                   | 8.0       | 84.5                                |
| 450                        | 70.5                              | 93.3      | 403.0                   | 6.7       | 92.9                                |

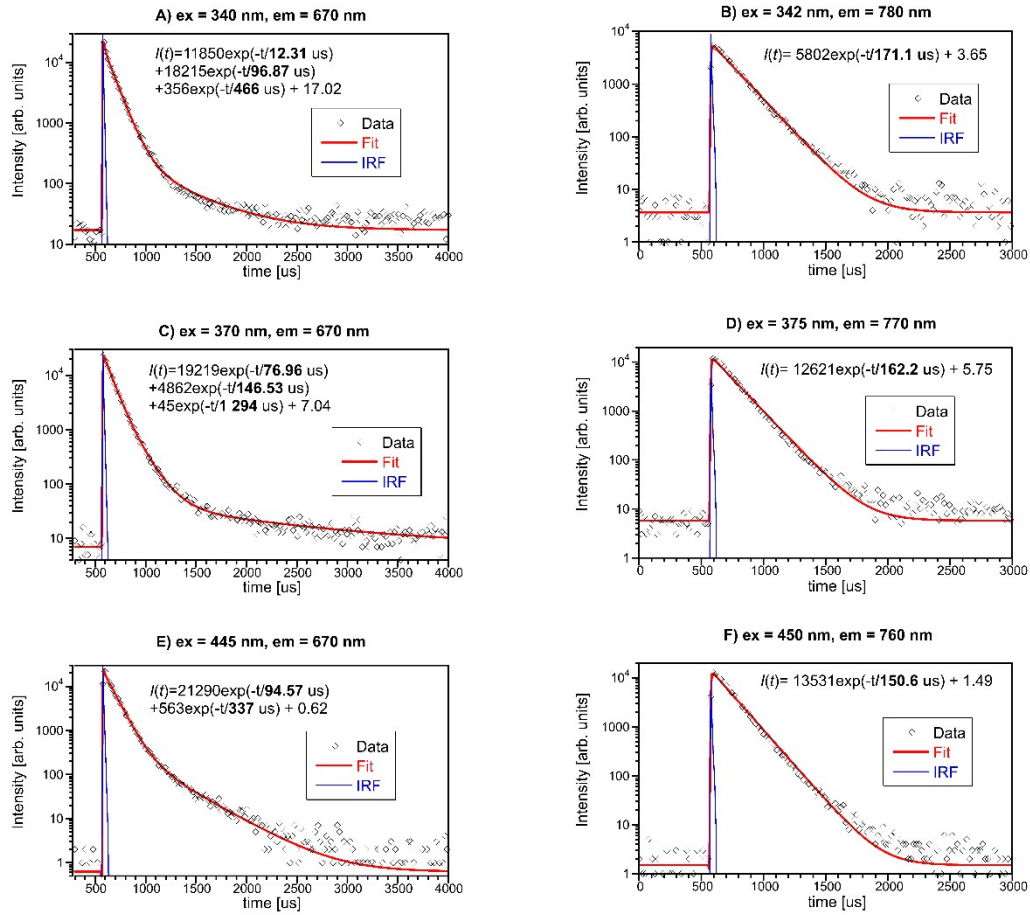

Fig. S7: PL decays of  $\text{Li}_2\text{MnCl}_4:\text{Eu}$ . Red solid line is convolution of function  $I(t)$  and instrumental response.

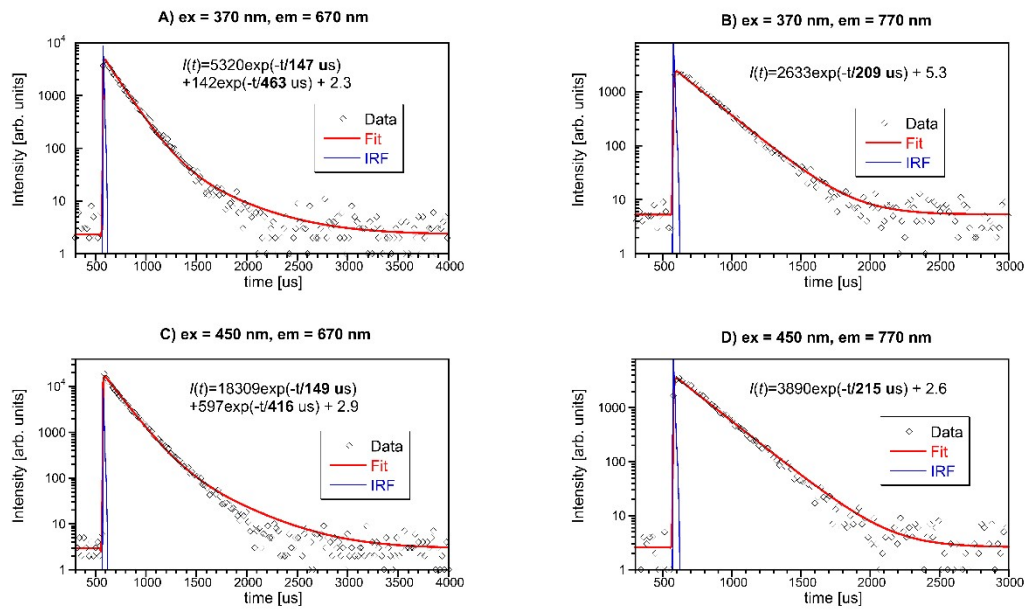

Fig. S8: PL decays of  $\text{Li}_2\text{MnCl}_4:\text{Ce}$ . Red solid line is convolution of function  $I(t)$  and instrumental response.

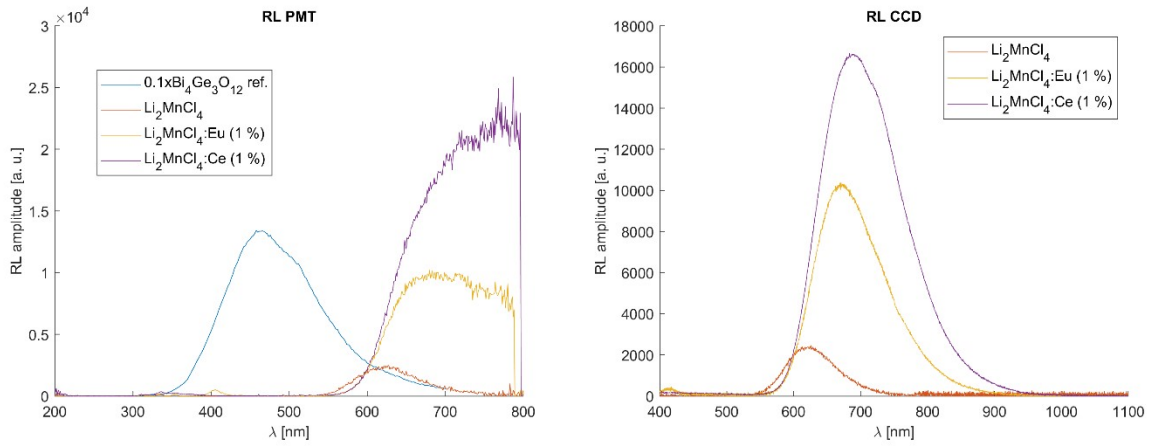

Fig. S9: RL spectra measured using PMT (left) and CCD (right) as photodetector.

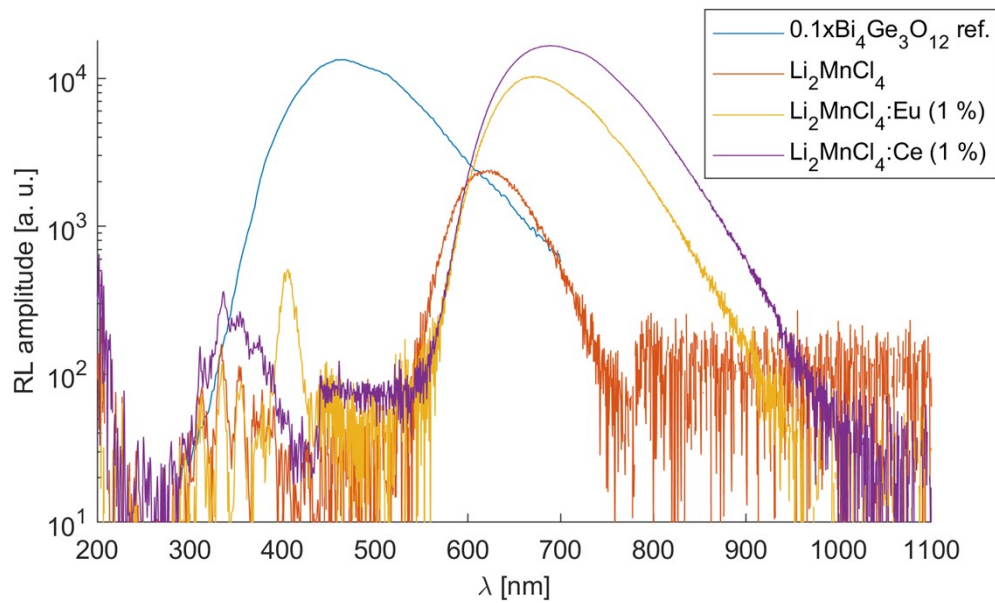

Figure S10: RL spectra of all three Li<sub>2</sub>MnCl<sub>4</sub> samples together with BGO reference sample. The amplitude of BGO spectrum was divided by 10 for better comparison. The artefact in BGO spectrum near 800 nm is due to overcorrection.

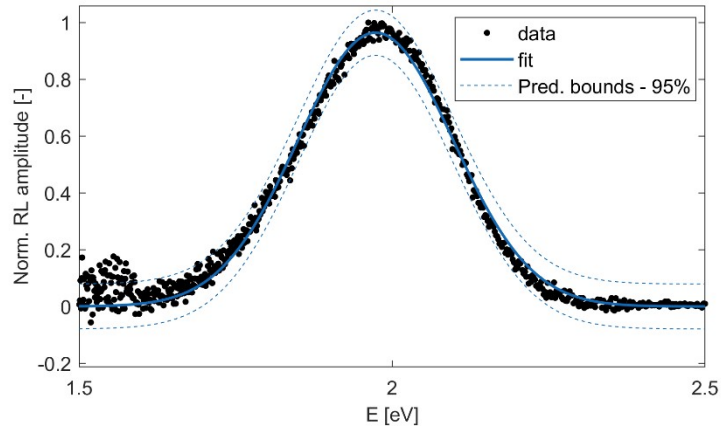

Fig. S11: Normalized RL spectra of undoped  $\text{Li}_2\text{MnCl}_4$  approximated by a single gaussian function.

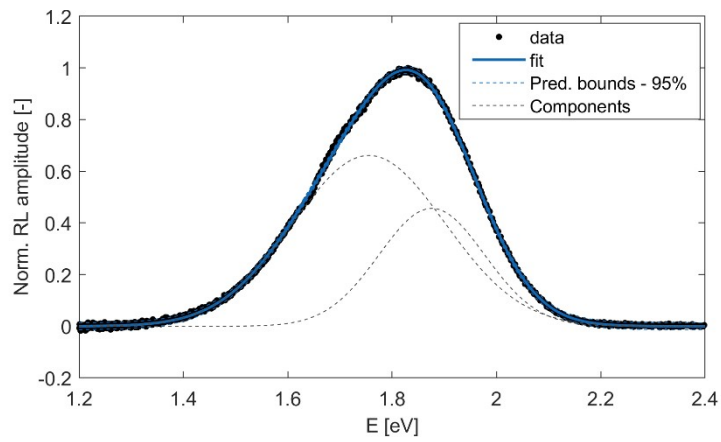

Fig. S12: Normalized RL spectra of  $\text{Li}_2\text{MnCl}_4:\text{Eu}^{2+}$  approximated by a sum of two gaussian functions.

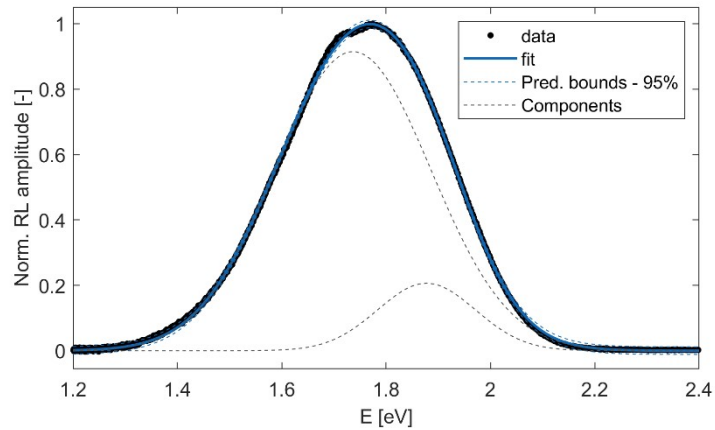

Fig. S13: Normalized RL spectra of  $\text{Li}_2\text{MnCl}_4:\text{Ce}^{3+}$  approximated by a sum of two gaussian functions
